# Supplementary material for: Steering Directional Charge Migration via Ordered Self-Assembled Monolayers for High-Efficiency BiVO4-Silicon Artificial Leaf
Source: Research Square preprint supplement (doi:10.21203/rs.3.rs-8675288/v1), 2026-02-05
Supplement: Supplementary file 1 [file 54b32e61b5b51425efb48699.docx]

**Supporting Information**

**Steering Directional Charge** **Migration via Ordered Self-Assembled Monolayers for High-Efficiency BiVO4-Silicon Artificial Leaf**

Min Zhao a,b †, Haoran Wu a,b †, Xiaodong Sun c, Wenbo Liu b, Zongyang Li b, Bowen Li b, Zhong-Yong Yuan d,Jingkun Wang b, *, Yuying Hao b, *, Tianyi Ma a, *

a. Centre for Atomaterials and Nanomanufacturing (CAN), School of Science, RMIT University, Melbourne, VIC 3000, Australia

b. College of Physics and Optoelectronics Engineering, Shanxi Key Lab of Photovoltaic Technology and Application, Taiyuan University of Technology, Taiyuan, 030024, China

c. Institute of Clean Energy Chemistry, Key Laboratory for Green Synthesis and Preparative Chemistry of Adv. Mater., College of Chemistry, Liaoning University, Shenyang 110036, People’s Republic of China

d. Collaborative Innovation Center of Materials Science, Nankai University, Tianjin 300350, China

† These authors contributed equally to this work.

*Correspondence to: Jingkun Wang (wangjingkun0048@link.tyut.edu.cn), Yuying Hao ([haoyuying@tyut.edu.cn](mailto:haoyuying@tyut.edu.cn)), Tianyi Ma ([tianyi.ma@rmit.edu.au](mailto:tianyi.ma@rmit.edu.au))


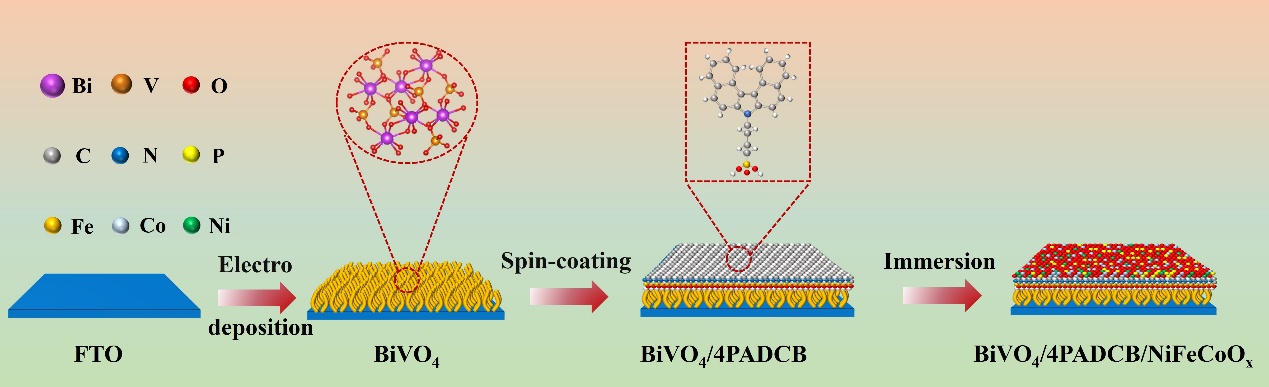


**Figure S1.** Schematic illustration of the synthesis procedure for the BiVO4/4PADCB/NiFeCoOx photoanode.


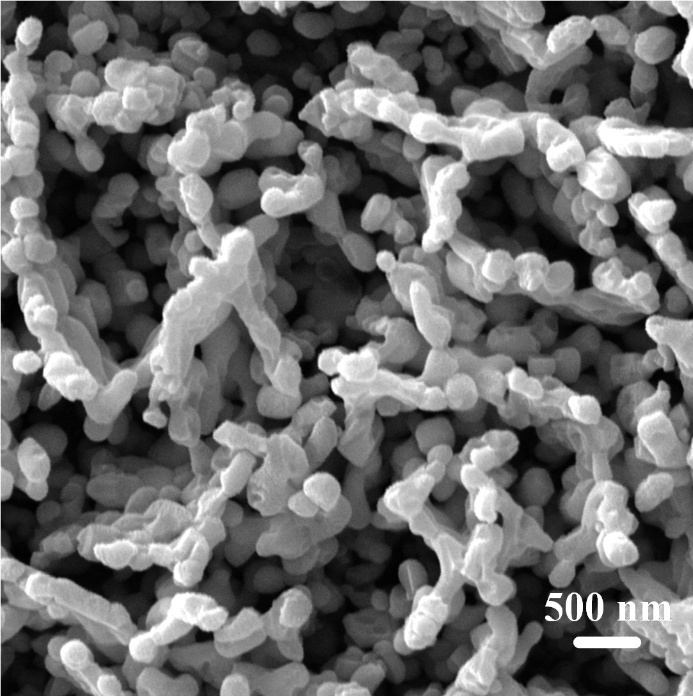


**Figure S2.** SEM image of BiVO4.


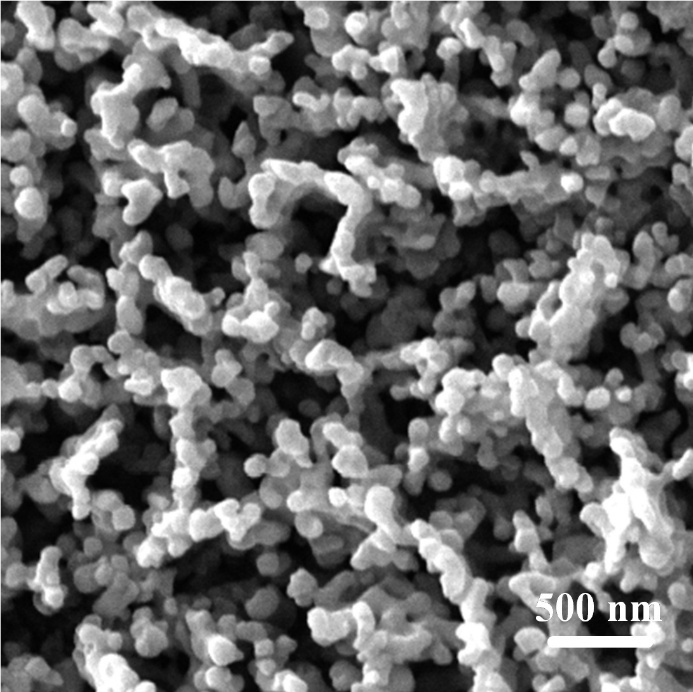


**Figure S3.** SEM image of BiVO4/4PADCB.


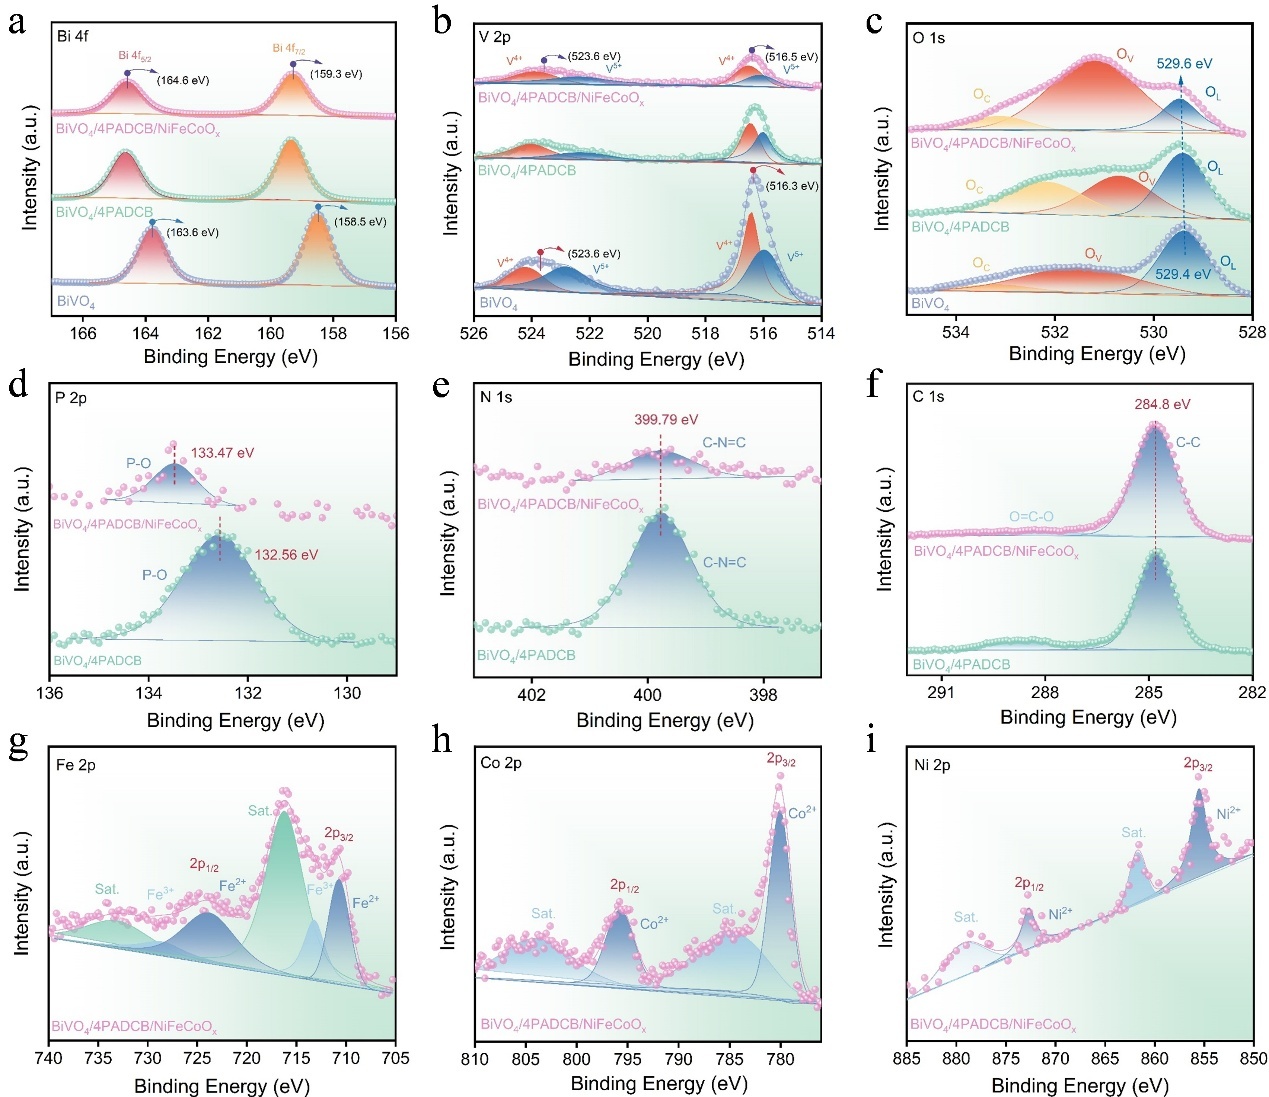


**Figure S4.** XPS spectra of BiVO4, BiVO4/4PADCB, BiVO4/4PADCB/NiFeCoOx. (a) Bi 4f, (b) V 2p, and (c) O 1s spectra of BiVO4, BiVO4/4PADCB, BiVO4/4PADCB/NiFeCoOx. (d) P 2p, (e) N 1s, and (f) C 1s spectra of BiVO4/4PADCB, BiVO4/4PADCB/NiFeCoOx. (g) Fe 2p, (h) Co 2p, and (i) Ni 2p spectra of BiVO4/4PADCB/NiFeCoOx.

The composition and elemental states of various photoanodes were characterized through X-ray photoelectron spectroscopy (XPS). Compared with pristine BiVO4, the Bi 4f and V 2p spectra of BiVO4/4PADCB and BiVO4/4PADCB/NiFeCoOx photoanodes exhibit slight positive binding energy shifts (Figures S4a, b). On the BiVO4/4PADCB/NiFeCoOx and BiVO4/4PADCB photoanodes, there is a noticeable shift in the P 2p orbital originating from 4PADCB, while no significant changes could be observed for the N1s and C1s (Figures S4d-f). These shifts in binding energies indicate strong interactions between 4PADCB and BiVO4, enabling excellent charge transport behavior at the contact interface. As shown in Figure S4c, the oxygen vacancy (Ov) content is significantly enhanced after 4PADCB and NiFeCoOx incorporation, indicating that the introduction of 4PADCB and NiFeCoOx cocatalysts effectively enhanced OER activity. Meanwhile, the constituent elements of the cocatalysts were revealed in the Ni 2p, Fe 2p, and Co 2p spectra, existing in multiple valence states (Figures S4g-i), confirming the presence of the NiFeCoOx cocatalyst. The results of SEM, TEM, XRD, Raman, and XPS demonstrate the successful modification of 4PADCB and NiFeCoOx onto BiVO4.


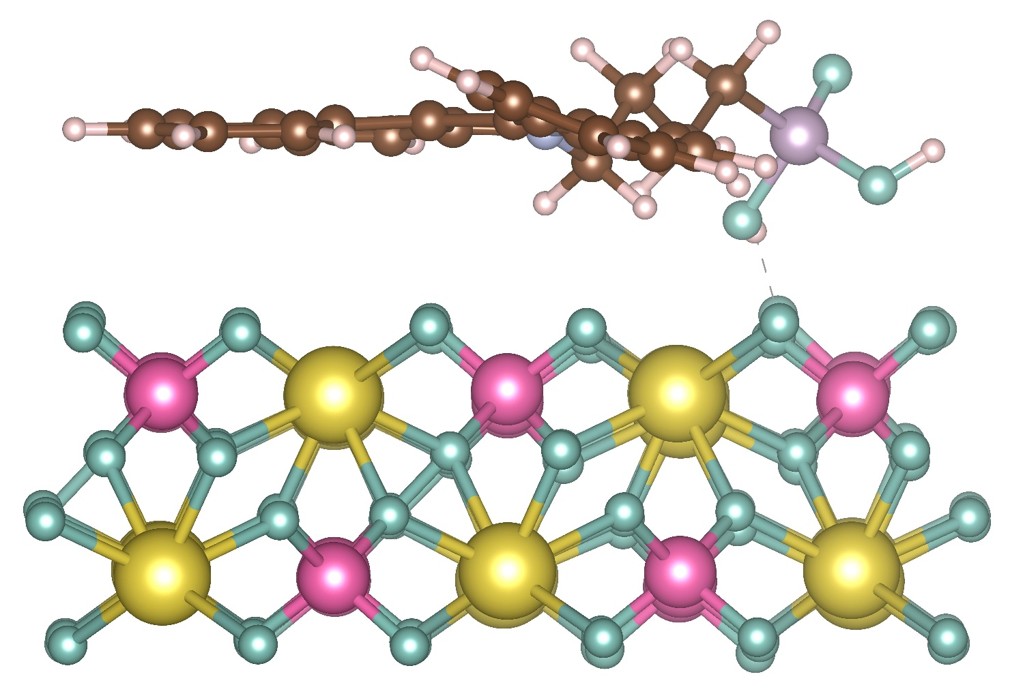


**Figure S5.** Optimized structure of BiVO4/4PADCB in side for DFT calculations.


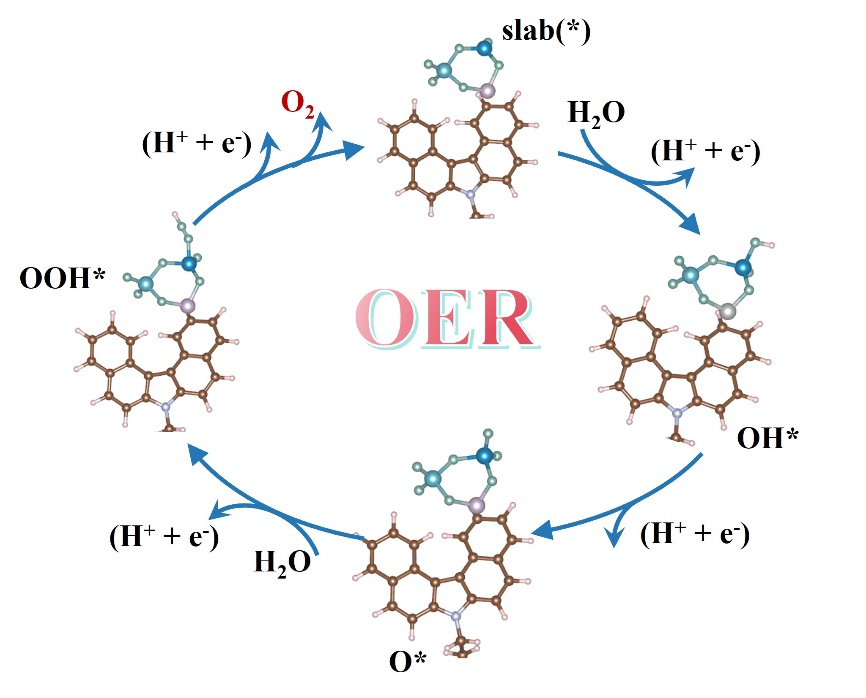


**Figure S6.** Catalytic OER pathway of 4PADCB/NiFeCoOx.


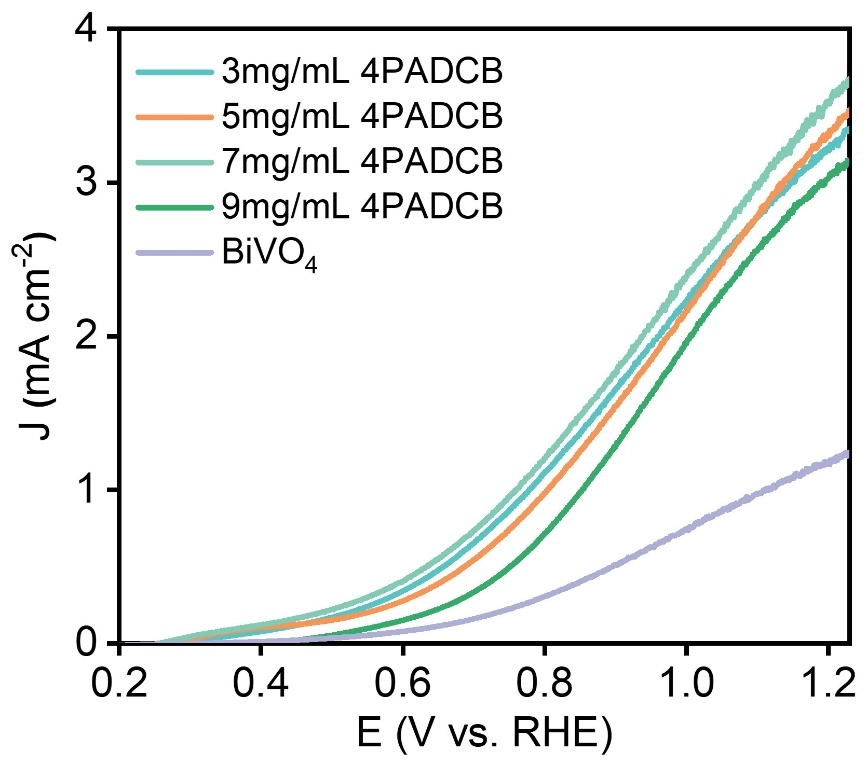


**Figure S7.** LSV curves of BiVO4/4PADCB photoanodes with the tunable amount of

4PADCB in 0.5M KBi electrolyte (pH = 9.3) under AM 1.5 G illumination (100 mW

cm-2).


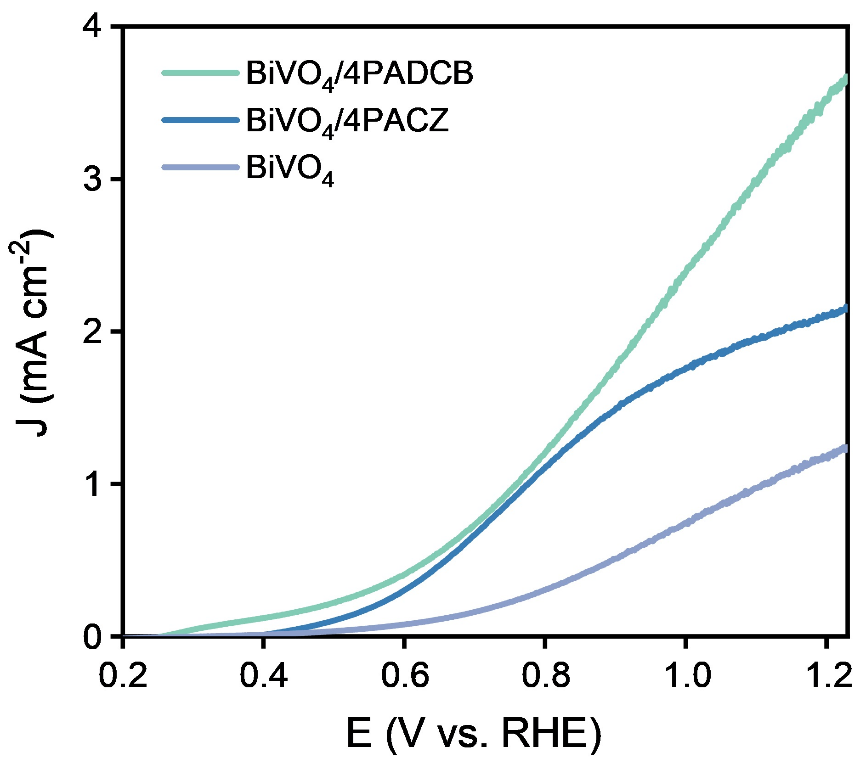


**Figure S8.** LSV curves of BiVO4/4PADCB and BiVO4/4PACZ photoanodes measured in 0.5 M potassium borate electrolyte (pH = 9.3) under AM 1.5G illumination (100 mW cm-2).


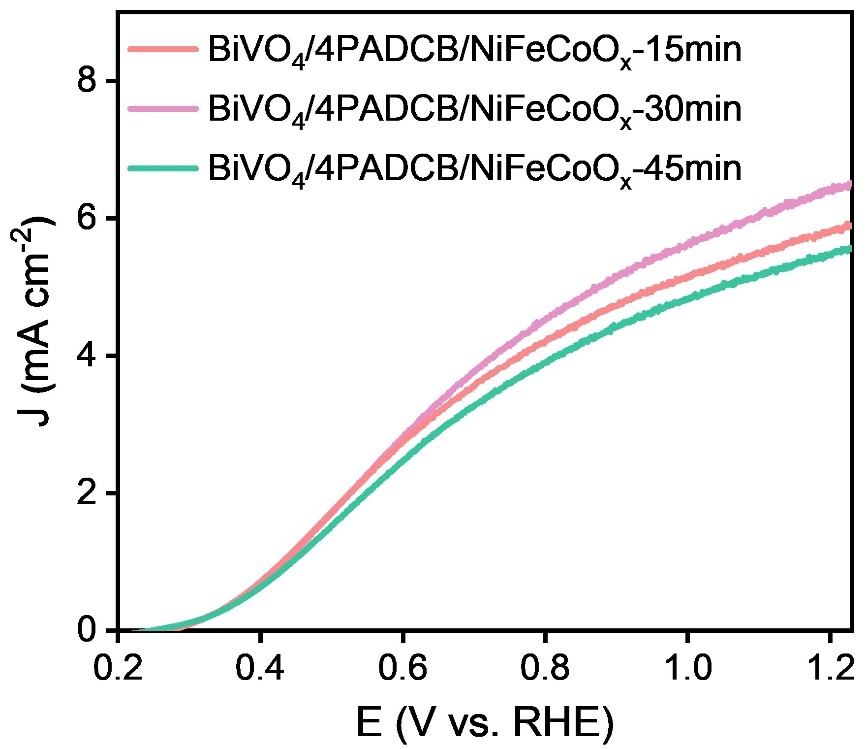


**Figure S9.** Comparison of NiFeCoOx immersion for different times of LSV measured by 0.5 M KBi under AM 1.5 G simulated solar radiation.


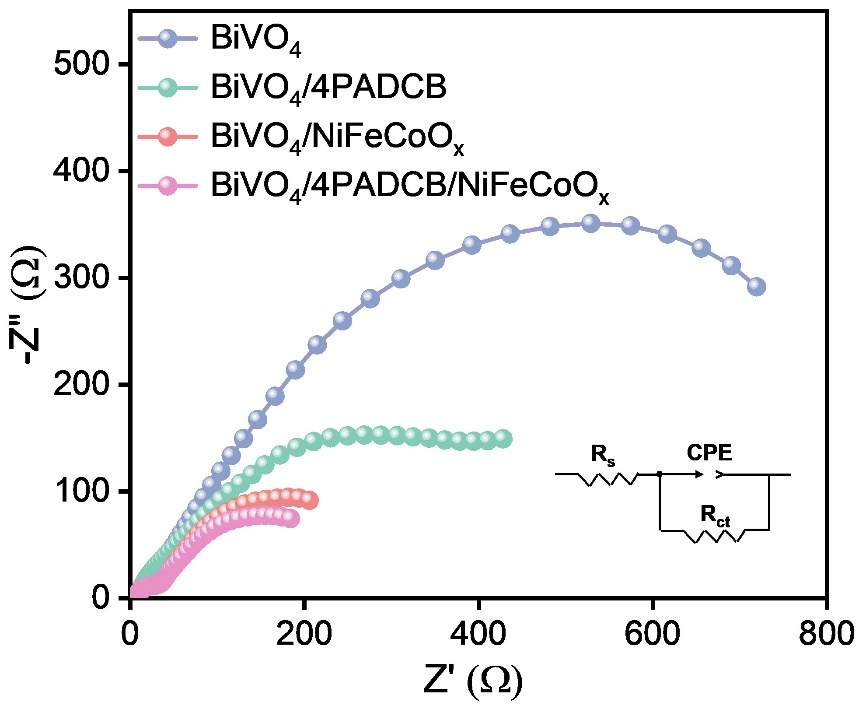


**Figure S10.** EIS Nyquist plots at 1.23 VRHE and of the BiVO4, BiVO4/4PADCB, BiVO4/NiFeCoOx and BiVO4/4PADCB/NiFeCoOx photoanode.


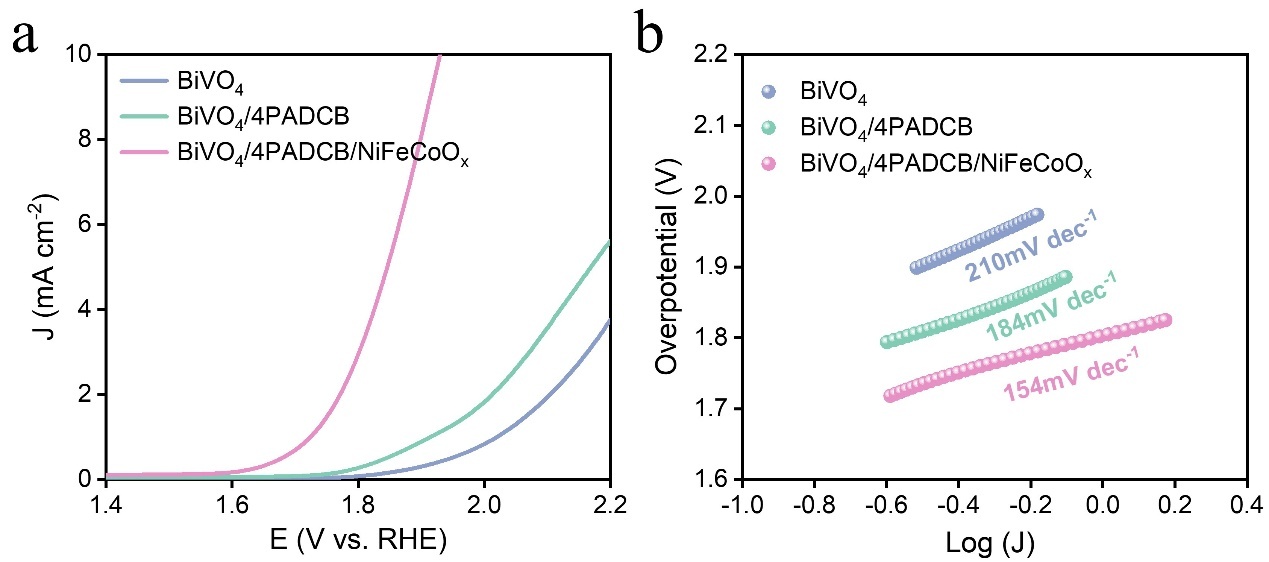


**Figure S11.** (a) LSV curves of BiVO4, BiVO4/4PADCB and BiVO4/4PADCB/NiFeCoOx. photoanodes in 0.5 M KBi under dark and (b) Tafel slope curves.


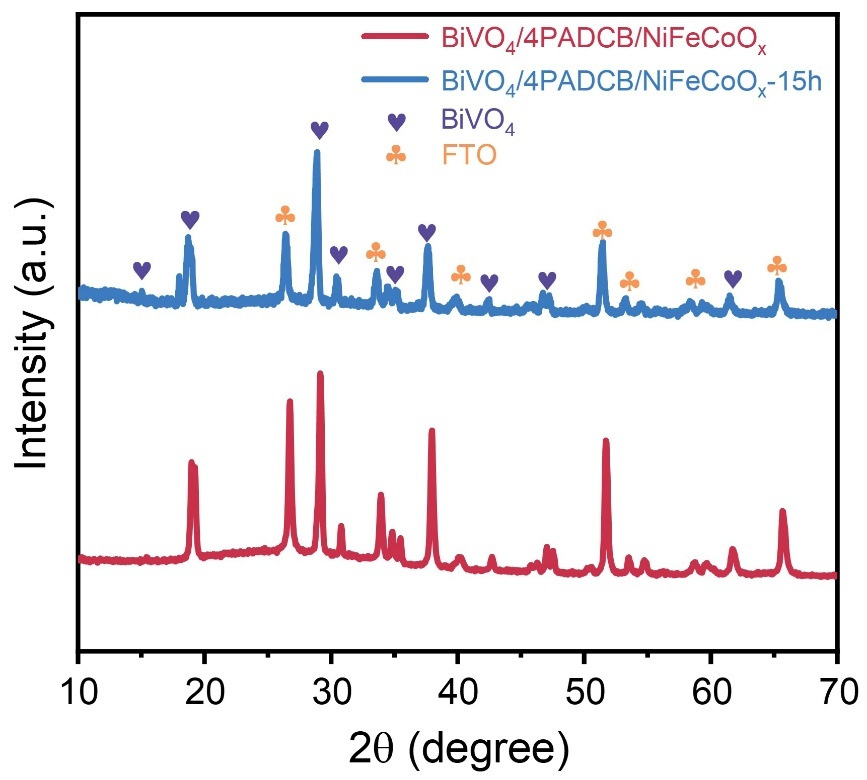


**Figure S12.** XRD patterns of BiVO4/4PADCB/NiFeCoOx before and after 15 h of stability test at 1.23 VRHE.


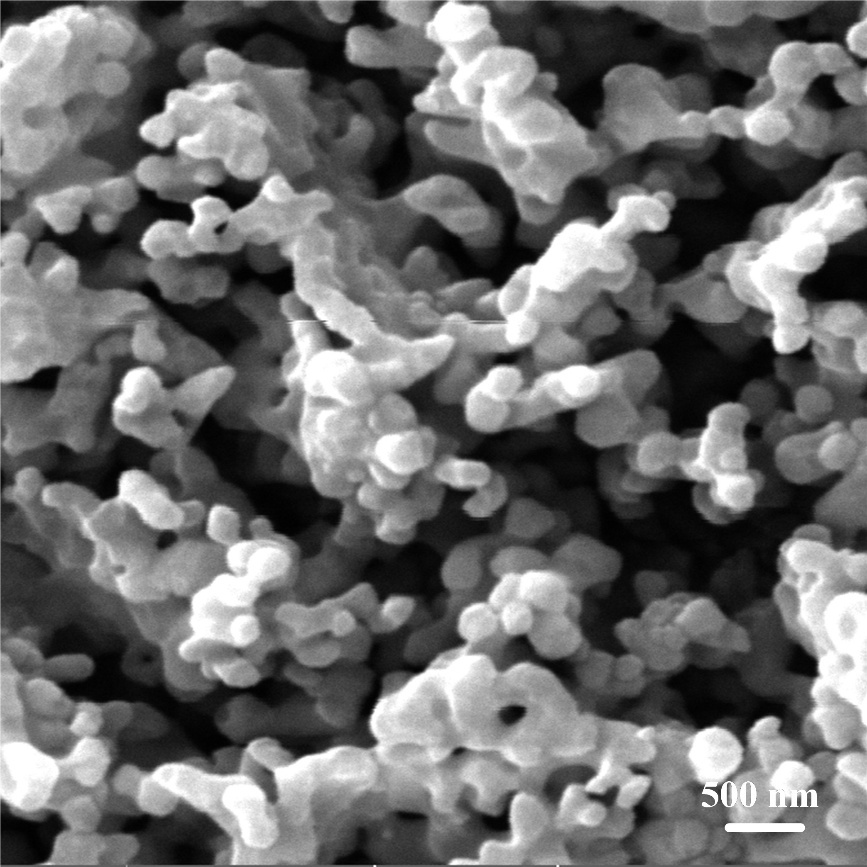


**Figure S13.** SEM image of BiVO4/4PADCB/NiFeCoOx after 15 h of stability test at 1.23 VRHE.


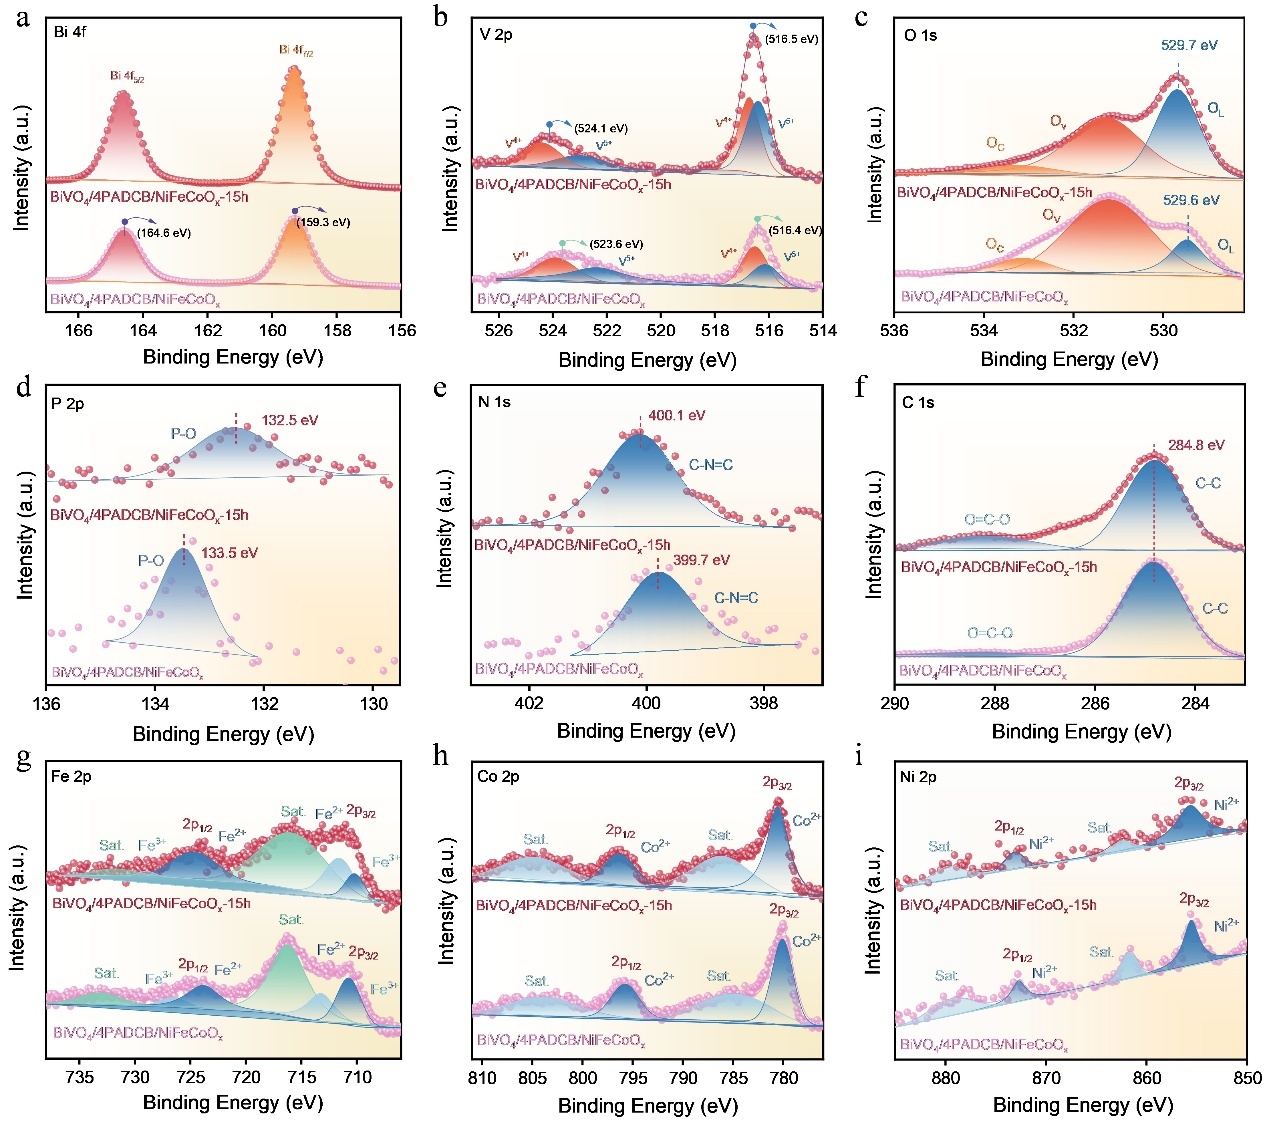


**Figure S14.** XPS spectra of BiVO4/4PADCB/NiFeCoOx. and BiVO4/4PADCB/NiFeCoOx-15h (a) Bi 4f, (b) V 2p, and (c) O1s, (d) P 2p, (e) N 1s, (f) C 1s. (g) Fe 2p, (h) Co 2p, and (i) Ni 2p spectra of BiVO4/4PADCB/NiFeCoOx. and BiVO4/4PADCB/NiFeCoOx-15h.


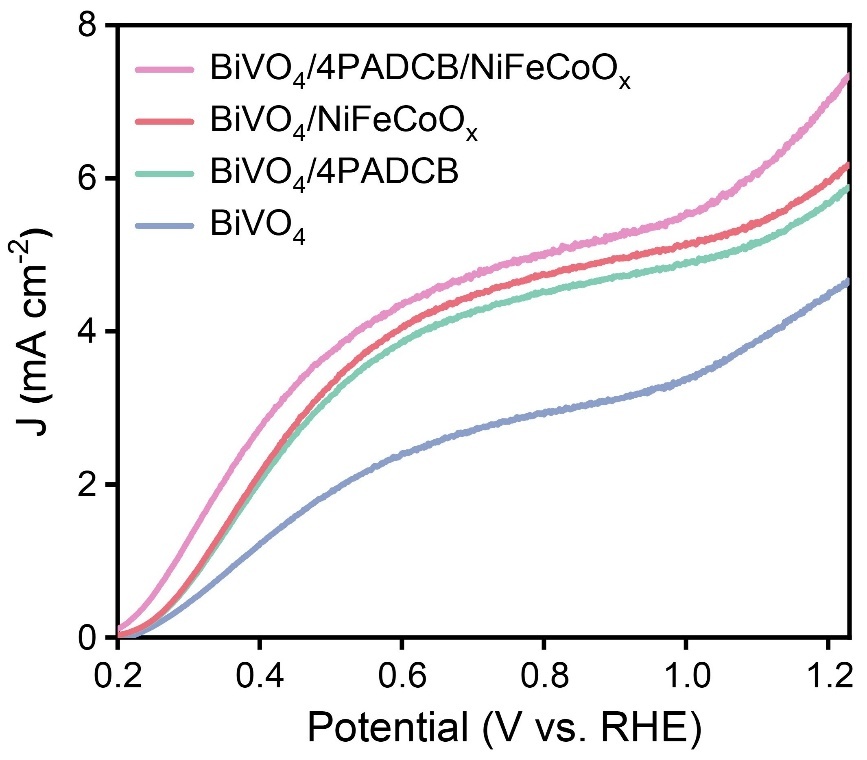


**Figure S15.** LSV curves of BiVO4, BiVO4/4PADCB, BiVO4/NiFeCoOx, and BiVO4/4PADCB/NiFeCoOx photoanodes in 0.5 M KBi electrolyte (pH = 9.3) with 0.1 M Na2SO3 solution under AM 1.5G simulated sunlight (100 mW cm−2)


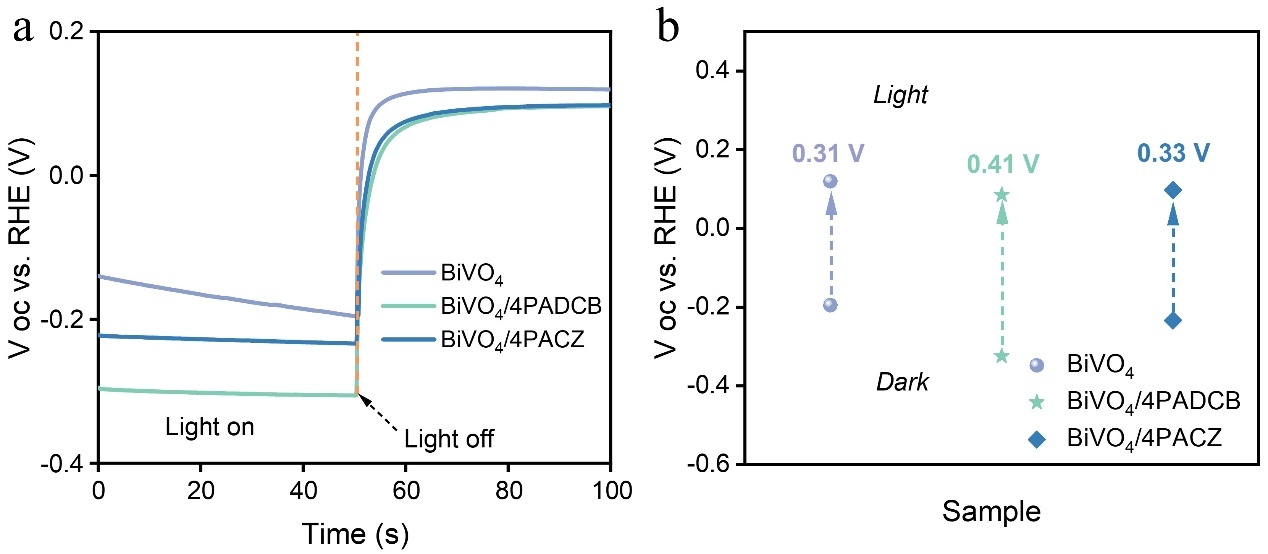


**Figure S16.** (a) OCP decay profiles and (b) OCP values.


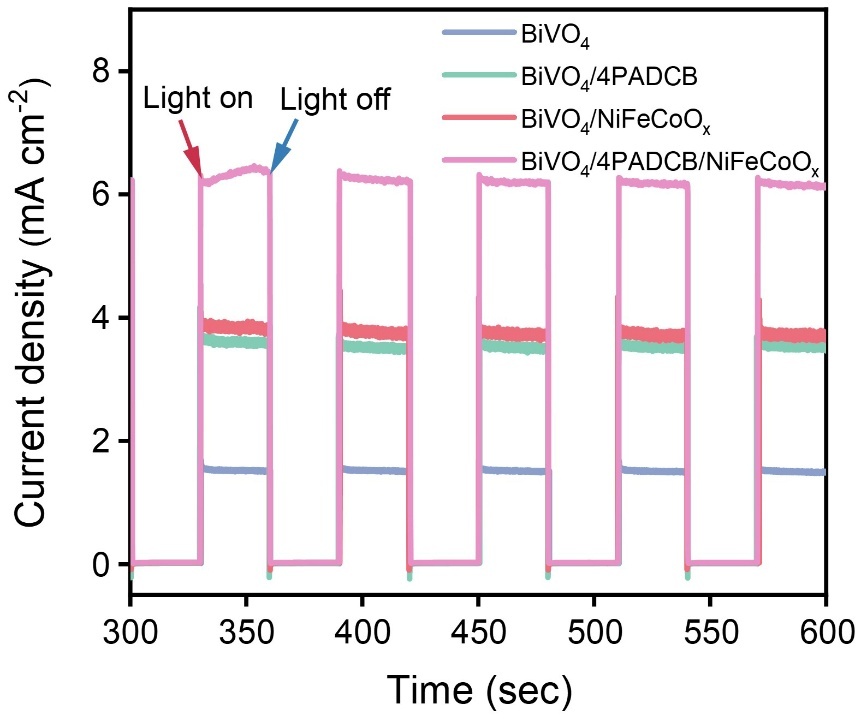


**Figure S17.** Transient photocurrent density curves of BiVO4, BiVO4/4PADCB, BiVO4/NiFeCoOx, and BiVO4/4PADCB/NiFeCoOx at 1.23 V vs. RHE in 0.5 M KBi aqueous solution under sequential illumination condition with an interval of 30 s on/off switch.


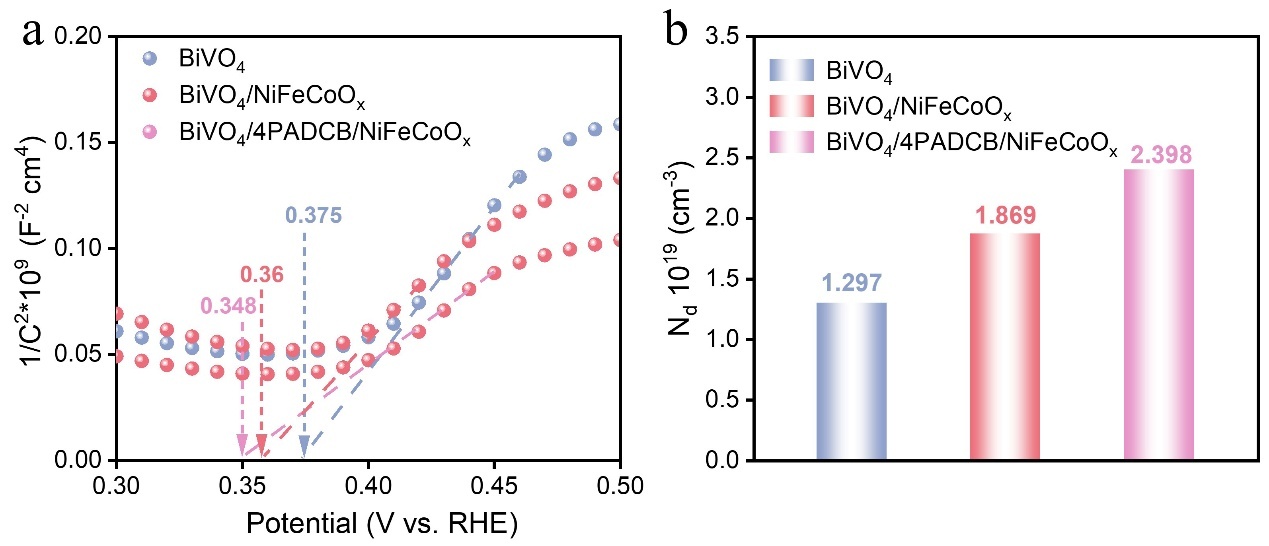


**Figure S18.** (a) Mott–Schottky plots at a frequency of 1 kHz, b) Nd of BiVO4, BiVO4/NiFeCoOx, and BiVO4/4PADCB/NiFeCoOx.


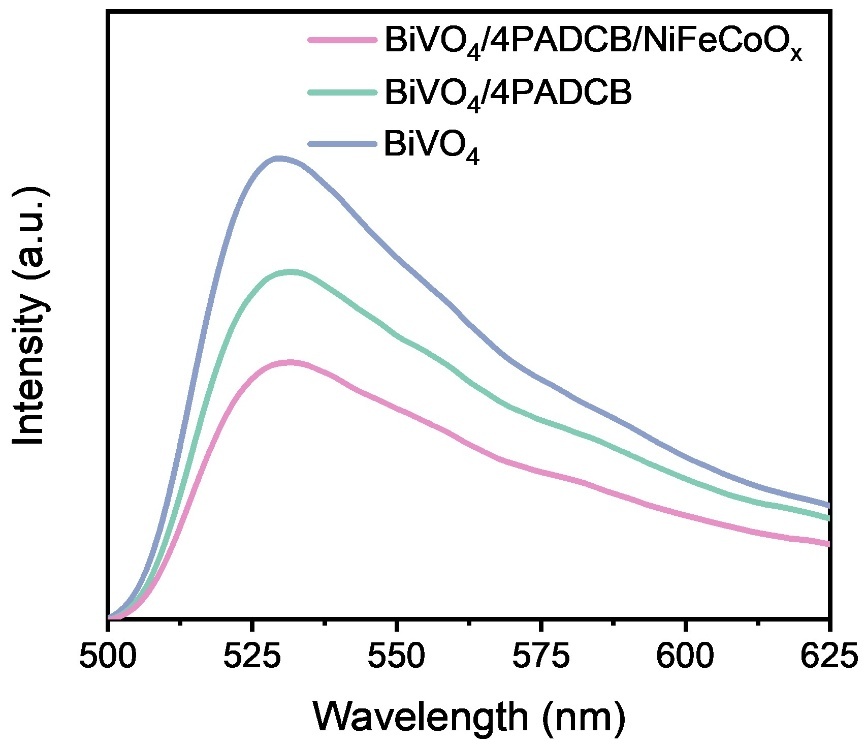


**Figure S19.** Steady state photoluminescence (PL) spectra of BiVO4, BiVO4/4PADCB, and BiVO4/4PADCB/NiFeCoOx photoanodes.


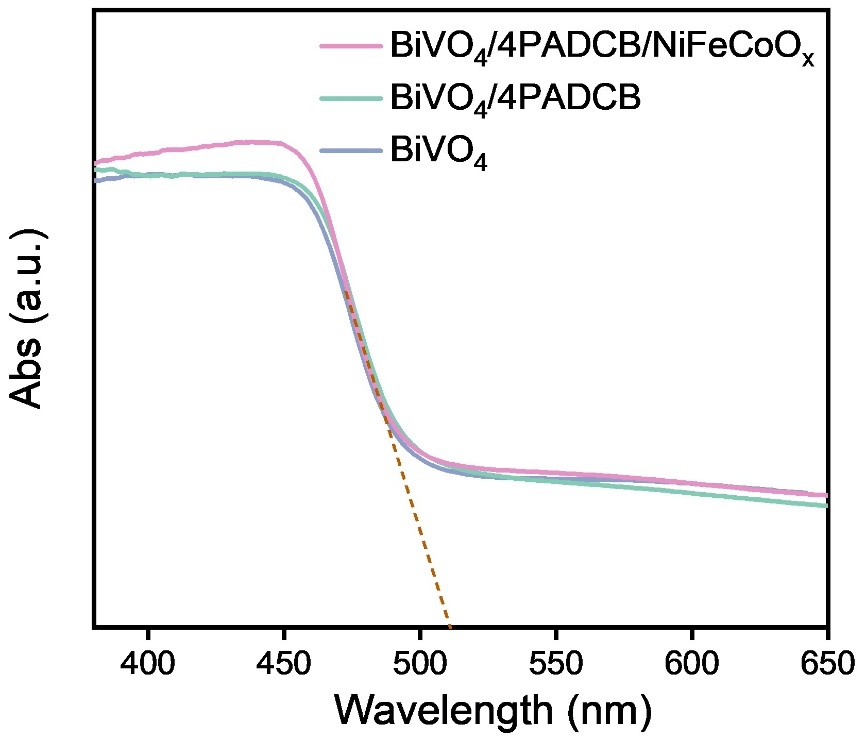


**Figure S20.** The UV-visible absorption spectra of BiVO4, BiVO4/4PADCB, and BiVO4/4PADCB/NiFeCoOx photoanodes.


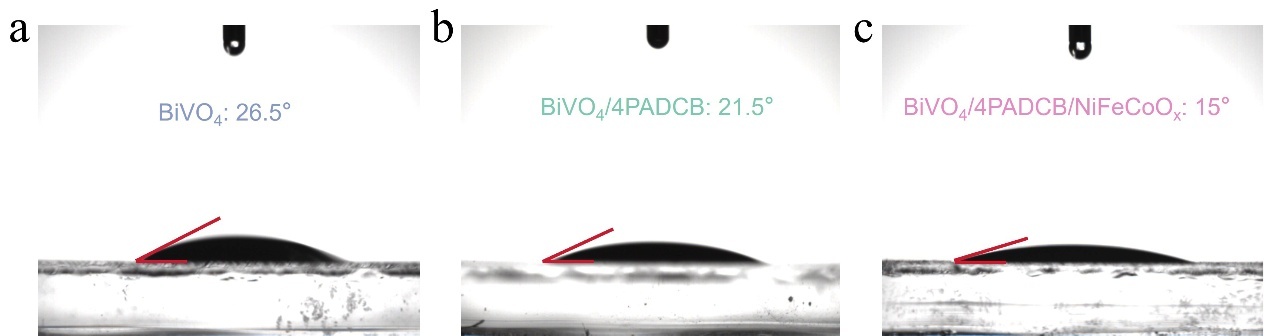


**Figure S21.** Water contact angle on (a) BiVO4, (b) BiVO4/4PADCB, and (c) BiVO4/4PADCB/NiFeCoOx.


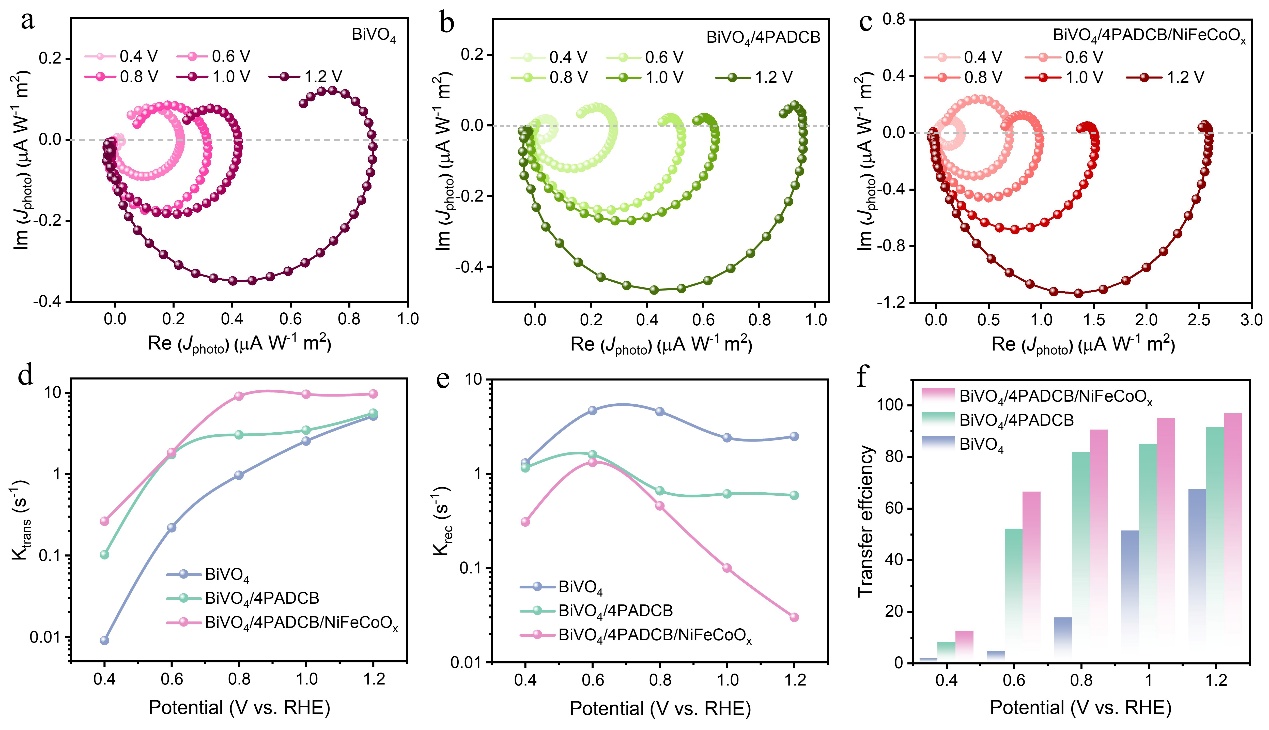


**Figure S22.** IMPS analysis of BiVO4, BiVO4/4PADCB, and BiVO4/4PADCB/NiFeCoOx under neutral water oxidation. IMPS responses of (a) BiVO4, (b) BiVO4/4PADCB, and (c) BiVO4/4PADCB/NiFeCoOx at various applied potentials. (d) Charge transfer rate constants (Ktrans), (e) charge recombination rate constants (Krec), (f) charge transfer efficiencies of corresponding photoanodes derived from IMPS data.


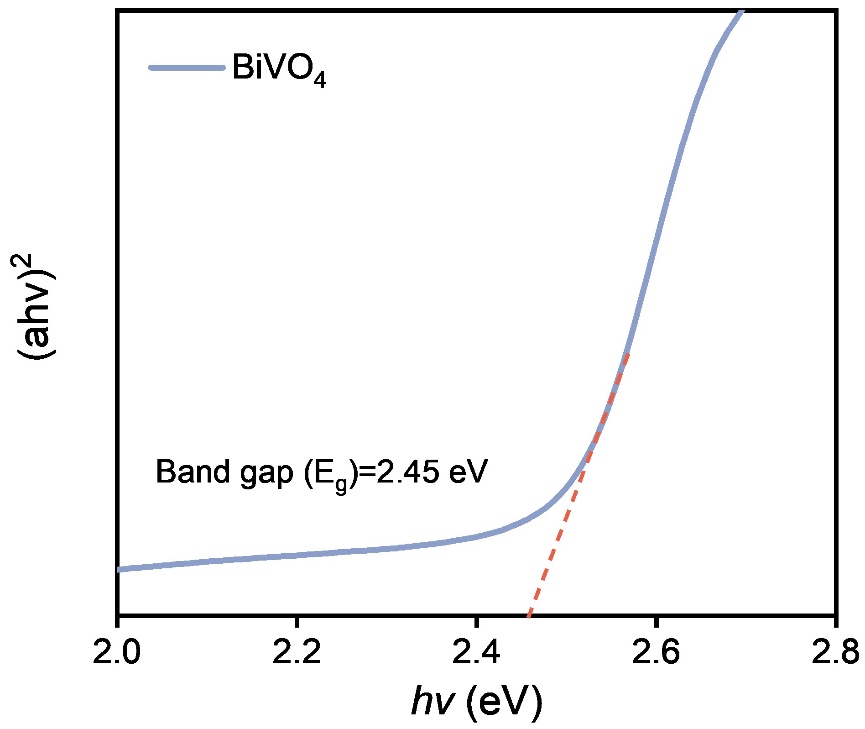


**Figure S23.** Tauc plot of BiVO4 photoanode.


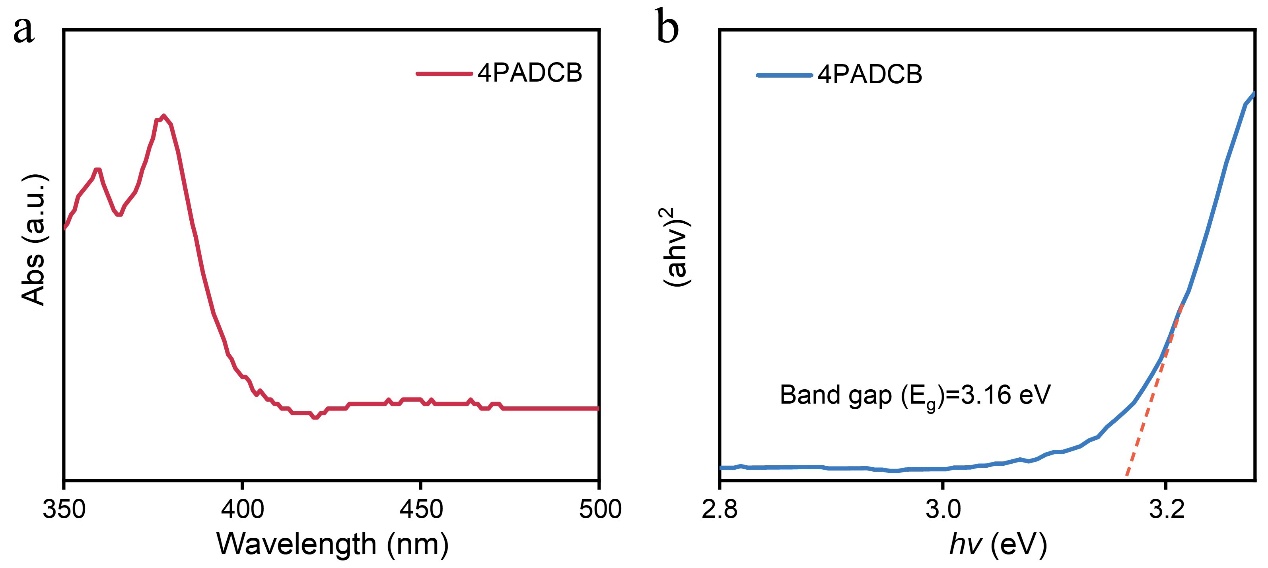


**Figure S24.** (a) UV-vis spectrum and (b) Tauc plot of 4PADCB.


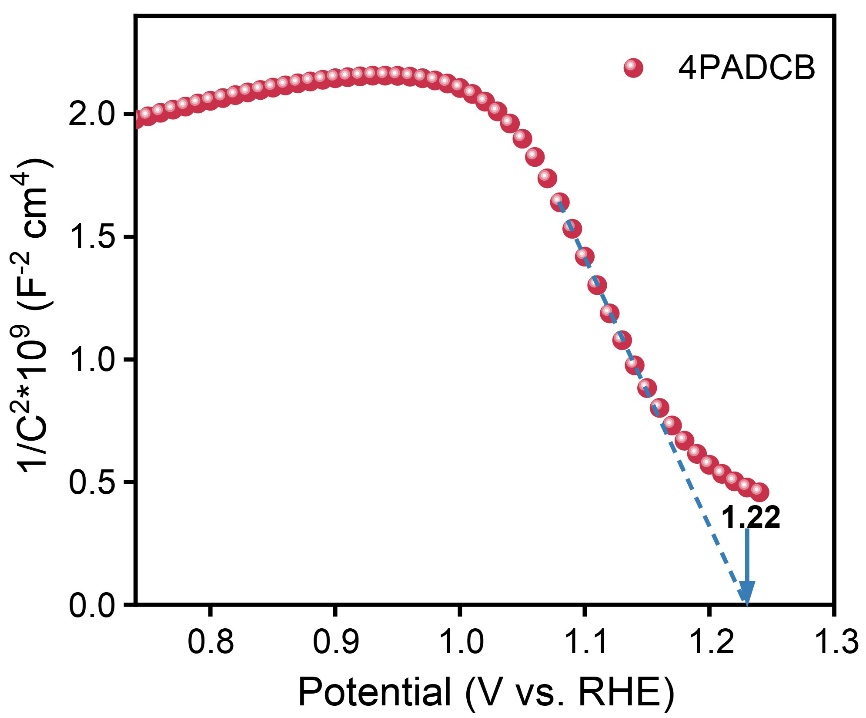


**Figure S25.** Mott-Schottky plots of 4PADCB.


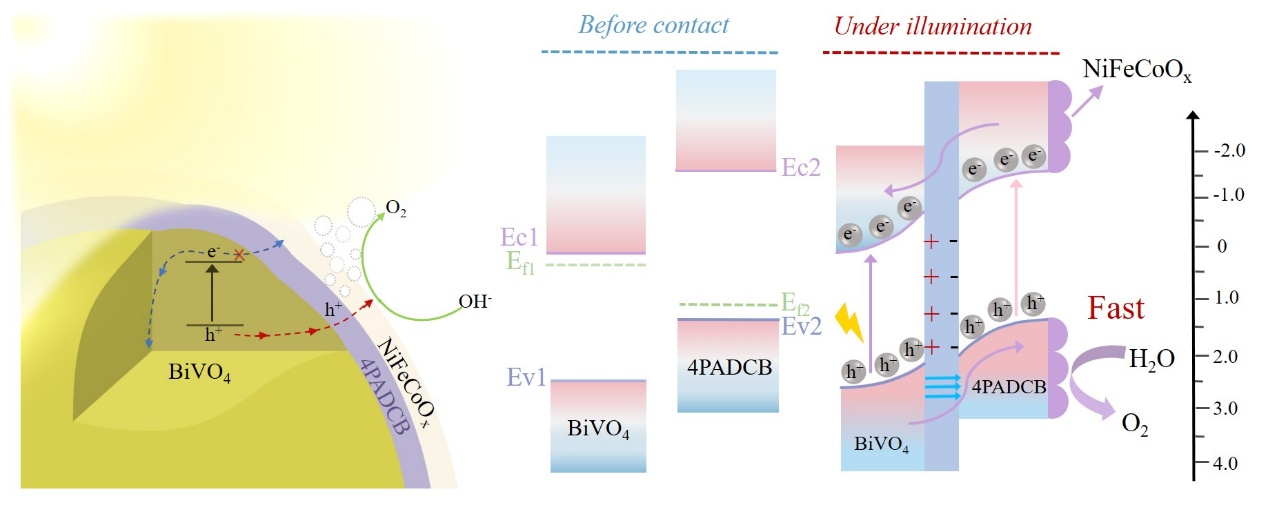


**Figure S26.** Energy band diagram of BiVO4/4PADCB.


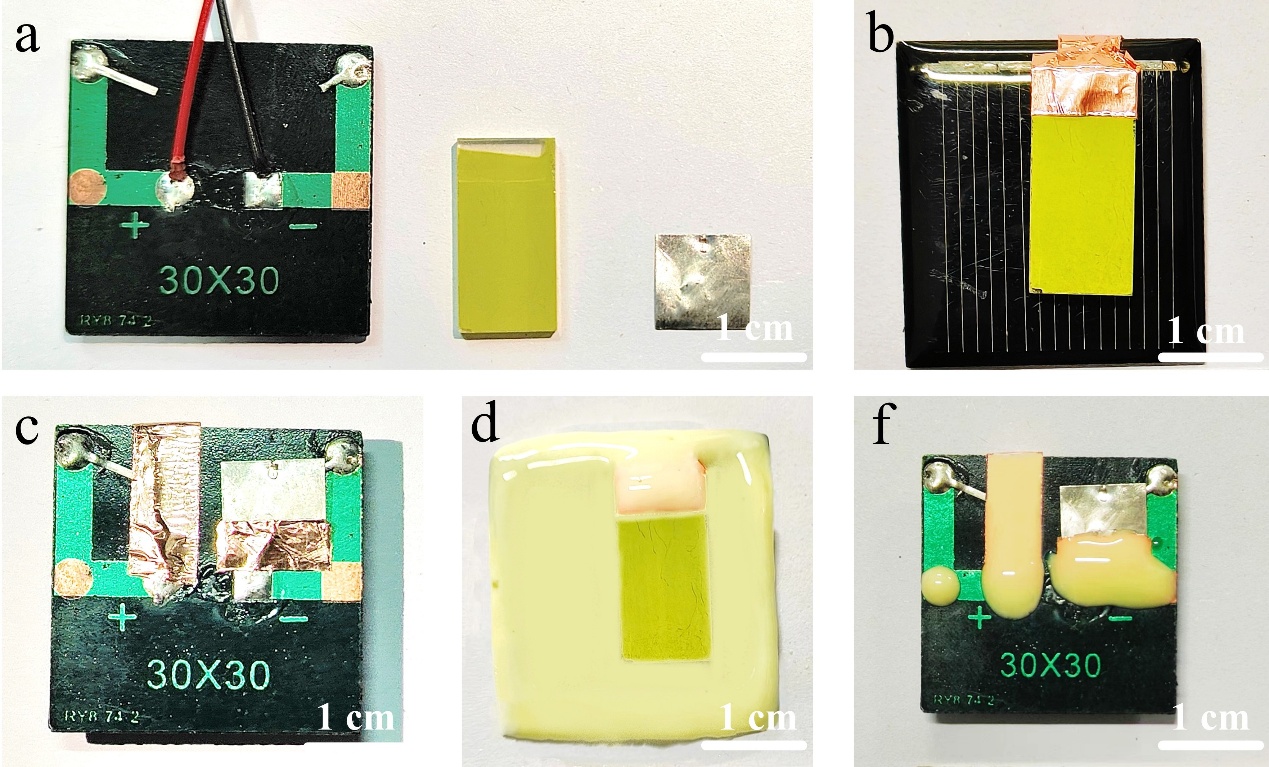


**Figure S27.** Digital images of a 1.5 cm ×1 cm artificial leaf.


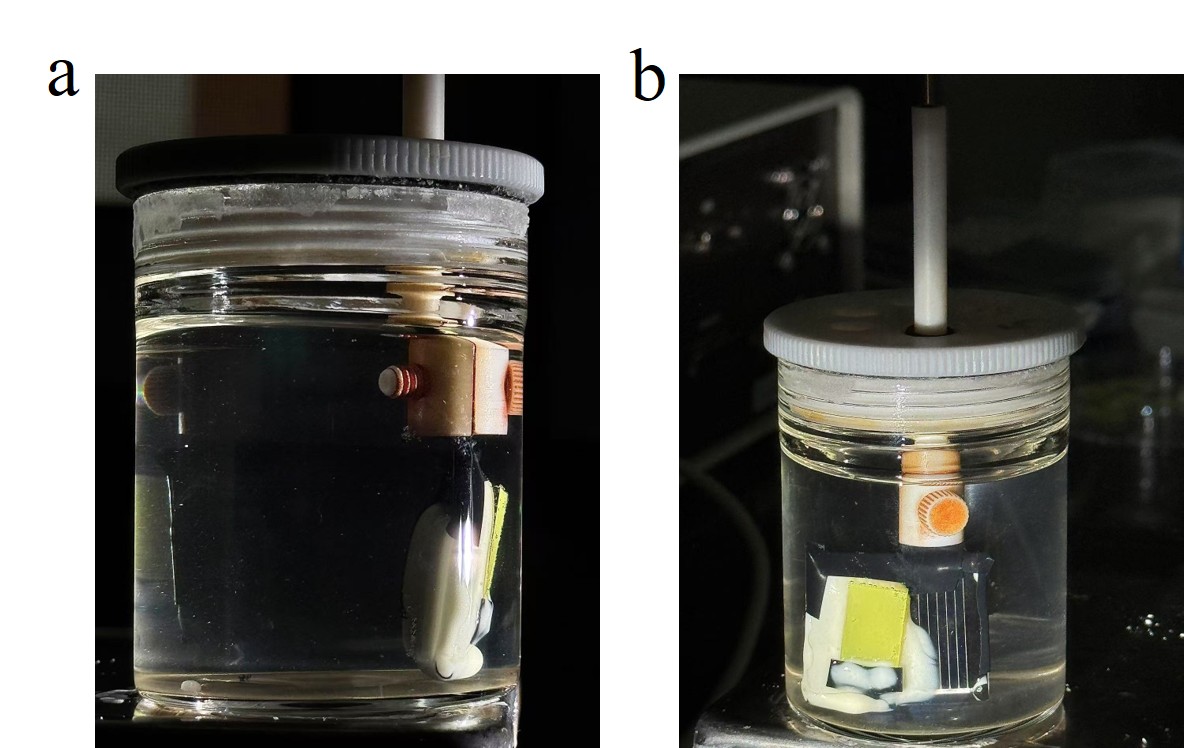


**Figure S28.** Images of (a) the back and (b) front sides of the operational artificial leaf.

**Table S1** Compare the PEC performance of the BiVO4/4PADCB/NiFeCoOx photoanode developed in this study with other promising organic and inorganic modified BiVO4 photoanodes.

| Photoanodes | J (mA cm-2 at 1.23 VRHE) | ηsep (%) | ηtrans (%) | Ref. |
| --- | --- | --- | --- | --- |
| BiVO4/4PADCB/NiFeCoOx | 6.34 | 98 | 95.5 | **This work** |
| BiVO4/P3HT-CuPc/LDH | 4.25 | 73.8 | 76.7 | 1 |
| NiFeCoOx/CPF-TCB/Mo:BiVO4 | 6.66 | 88 | 85 | 2 |
| R-BV/CoPy/FN-H | 4.75 | 86.6 | 80 | 3 |
| PEG-4000/BiVO4 | 3.64 | 84.2 | 81 | 4 |
| NiFeOx/CTF-BTh/Mo:BiVO4 | 5.7 | 94 | 61.3 | 5 |
| BiVO4/CTP2/FN | 4.05 | 73.3 | 70 | 6 |
| BiVO4/g-C3N4-NS | 3.12 | 53 | 67 | 7 |
| NiFeOOH/MoOx/MQD/BiVO4 | 5.85 |  | 91 | 8 |
| FeOOH@1T-MoS2@BiVO4 | 4.02 | 84.2 | 81.9 | 9 |
| BVO-Ov/FeOOH | 7.0 |  | 94.9 | 10 |
| Ov-BiVO4@NiFe-MOFs | 5.3 |  |  | 11 |
| BiVO4/CuSCN/NiFeOx | 5.6 | 96.2 | 79.2 | 12 |
| BiVO4/CuS/NiFeCoOx | 6.56 | 97 | 93.5 | 13 |
| CQDs/FeOOH/BiVO4 | 2.53 |  | 81.1 | 14 |
| C-BiVO4/CQDs | 4.83 | 81.2 | 77.9 | 15 |
| BiVO4/Co3O4/FeOOH/NiOOH | 6.34 |  |  | 16 |
| N-BiVO4/NiOOH/FeOOH | 5.0 | 90 |  | 17 |
| BiVO4@aNiFe-MOFs | 4.34 | 96 | 82 | 18 |

**Table S2** Performance comparison state-of-the-art BiVO4-based photoanode in tandem with the solar cell for zero-bias photoelectrochemical water splitting.

| **Photoanodes** | **Solar cell** | **STH**  **(%)** | **Area**  **(cm2)** | **Ref.** |
| --- | --- | --- | --- | --- |
| BiVO4/4PADCB/NiFeCoOx | Si | 8.75 | 1.5 | **This work** |
| BVO-Ov/FeOOH | Si | 8.4 | 0.126 | 10 |
| Co-Pi/BiVO4/WO3 | GaAs/InGaAsP | 8.1 | 1.0 | 19 |
| NiOOH/FeOOH/BaSnO3-x | Perovskite | 7.9 | 1.0 | 20 |
| NiOOH/FeOOH/BiVO4//Ni2FeOx/Fe2O3 | 2jn c-Si | 7.7 | 1.0 | 21 |
| BiVO4/CuS/NiFeCoOx | Si | 7.7 | 1.0 | 13 |
| NiOOH/FeOOH/W,Mo:BiVO4/WO3 | Dye-sensitized | 7.1 | 1.0 | 22 |
| BiVO4/SnO2 | Perovskite | 7.0 | 3.11 | 23 |
| NiFeCoOx/CPF-TCB/Mo:BiVO4/SnO2 | Perovskite | 6.75 | 1.0 | 2 |
| 2 × NiOOH/FeOOH/BiVO4 (dual PA) | Perovskite | 6.5 | 0.25 | 24 |
| NiOOH/FeOOH/Mo:BiVO4/SnO2 | Perovskite | 6.3 | 0.25 | 25 |
| NiFeOx/BiVO4/In2O3 | Perovskite/Si | 6.1 | 1.0 | 26 |
| NiOOH/FeOOH/W,Mo:BiVO4/WO3 | Dye-sensitized | 5.7 | 2.25 | 27 |
| Co-Pi/W:BiVO4 | 2jn a-Si | 4.9 | 1.0 | 28 |
| CoOx/BiVO4/WO3/SnO2 | Perovskite | 3.5 | 0.14 | 29 |
| Co-Pi/BiVO4 | Perovskite | 2.5 | 0.54 | 30 |
| NiOOH/FeOOH/BiVO4 | OPV | 2.2 | 0.036 | 31 |

**References**

1 Pei, H. *et al.* A novel BiVO4/P3HT photoanode for highly efficient water oxidation and its hole energy offset effect with CuPc derivative. *Appl. Catal. B-Environ.* **318**, 121865 (2022).

2 Yang, J. W. *et al.* High-efficiency unbiased water splitting with photoanodes harnessing polycarbazole hole transport layers. *Energ. Environ. Sci.* **17**, 2541-2553 (2024).

3 Ning, X. *et al.* An efficient strategy for boosting photogenerated charge separation by using porphyrins as interfacial charge mediators. *Angew. Chem. Int. Edit.* **58**, 16800-16805 (2019).

4 Deng, Y., Fu, X., Zhang, Y., Zhu, Y. & Wei, Y. Efficient oxygen evolution reaction on polyethylene glycol‐modified BiVO4 photoanode by speeding up proton transfer. *Small* **18**, 2201410 (2022).

5 Zhang, Y. *et al.* Stable Unbiased photo‐electrochemical overall water splitting exceeding 3% efficiency via covalent triazine framework/metal oxide hybrid photoelectrodes. *Adv. Mater.* **33**, 2008264 (2021).

6 Pan, Q. *et al.* Covalent Triazine-based polymers with controllable band alignment matched with BiVO4 to boost photogeneration of holes for water splitting. *Chem. Mater.* **31**, 8062-8068 (2019).

7 Feng, C. *et al.* Ultrathin graphitic C3N4 nanosheets as highly efficient metal-free cocatalyst for water oxidation. *Appl. Catal. B-Environ.* **205**, 19-23 (2017).

8 Song, Y. *et al.* Engineering MoOx/MXene hole transfer layers for unexpected boosting of photoelectrochemical water oxidation. *Angew. Chem. Int. Edit.* **61**, 2200946 (2022).

9 Yu, L. *et al.* Phase engineering of 1T-MoS2 on BiVO4 photoanode with p–n Junctions: establishing high speed charges transport channels for efficient photoelectrochemical water splitting. *Chem. Eng. J.* **472,** 144965 (2023).

10 Liu, B. *et al.* A standalone bismuth vanadate-silicon artificial leaf achieving 8.4% efficiency for hydrogen production. *Nat. Commun.* **16**, 2792 (2025).

11 Pan, J. B. *et al.* Activity and stability boosting of an oxygen‐vacancy‐rich BiVO4 photoanode by NiFe‐MOFs thin layer for water oxidation. *Angew. Chem. Int. Edit.* **60**, 1433-1440 (2020).

12 Wang, J. *et al.* The CuSCN layer between BiVO4 and NiFeOx for facilitating photogenerated carrier transfer and water oxidation kinetics. *J. Colloid Interf. Sci.* **666**, 57-65 (2024).

13 Wang, J. *et al.* Photothermal CuS as a hole transfer layer on BiVO4 photoanode for efficient solar water oxidation. *Angew. Chem. Int. Edit.* **64**, 2507259 (2025).

14 Zhou, T. *et al.* Dramatically enhanced solar-driven water splitting of BiVO4 photoanode via strengthening hole transfer and light harvesting by co-modification of CQDs and ultrathin β-FeOOH layers. *Chem. Eng. J.* **403**, 126350 (2021).

15 Wang, Y. *et al.* Charge relays via dual carbon‐actions on nanostructured BiVO4 for high performance photoelectrochemical water splitting. *Adv. Funct. Mater.* **32**, 2112738 (2022).

16 He, B. *et al.* General and robust photothermal‐heating‐enabled high‐efficiency photoelectrochemical water splitting. *Adv. Mater.* **33**, 2004406 (2021).

17 Kim, T. W., Ping, Y., Galli, G. A. & Choi, K.-S. Simultaneous enhancements in photon absorption and charge transport of bismuth vanadate photoanodes for solar water splitting. *Nat. Commun.* **6**, 9769 (2015).

18 Bai, W. *et al.* Amorphous metal-organic frameworks loaded on BiVO4 photoanodes with unique internal metal-like structure for promoting photoelectrochemical water splitting. *Appl. Catal. B-Environ.* **352**, 124023 (2024).

19 Pihosh, Y. *et al.* Photocatalytic generation of hydrogen by core-shell WO3/BiVO4 nanorods with ultimate water splitting efficiency. *Sci. Rep.* **5**, 11141 (2015).

20 Kim, M. *et al.* Oxygen‐vacancy‐introduced BaSnO3−δ photoanodes with tunable band structures for efficient solar‐driven water splitting. *Adv. Mater.* **31**, 1903316 (2019).

21 Kim, J. H. *et al.* Hetero-type dual photoanodes for unbiased solar water splitting with extended light harvesting. *Nat. Commun.* **7**, 13380 (2016).

22 Shi, X. *et al.* Unassisted photoelectrochemical water splitting exceeding 7% solar-to-hydrogen conversion efficiency using photon recycling. *Nat. Commun.* **7**, 11943 (2016).

23 Xu, Z., Chen, L., Brabec, C. J. & Guo, F. All printed photoanode/photovoltaic mini‐module for water splitting. *Small Methods* **7**, 2300619 (2023).

24 Wang, S. *et al.* New BiVO4 dual photoanodes with enriched oxygen vacancies for efficient solar‐driven water splitting. *Adv. Mater.* **30**, 1800486 (2018).

25 Xiao, S. *et al.* Integration of inverse nanocone array based bismuth vanadate photoanodes and bandgap-tunable perovskite solar cells for efficient self-powered solar water splitting. *J. Mater. Chem. A* **5**, 19091-19097 (2017).

26 Lee, M. G. *et al.* Tailored BiVO4/In2O3 nanostructures with boosted charge separation ability toward unassisted water splitting. *Carbon Energy* **5**, 321 (2023).

27 Shi, X. *et al.* Unassisted photoelectrochemical water splitting beyond 5.7% solar-to-hydrogen conversion efficiency by a wireless monolithic photoanode/dye-sensitised solar cell tandem device. *Nano Energy* **13**, 182-191 (2015).

28 Abdi, F. F. *et al.* Efficient solar water splitting by enhanced charge separation in a bismuth vanadate-silicon tandem photoelectrode. *Nat. Commun.* **4**, 3195 (2013).

29 Baek, J. H. *et al.* BiVO4/WO3/SnO2 double-heterojunction photoanode with enhanced charge separation and visible-transparency for bias-free solar water-splitting with a perovskite solar cell. *ACS Appl. Mater. Interfaces* **9**, 1479-1487 (2017).

30 Chen, Y.-S., Manser, J. S. & Kamat, P. V. All solution-processed lead halide perovskite-BiVO4 tandem assembly for photolytic solar fuels production. *J. Am. Chem. Soc.* **137**, 974-981 (2015).

31 Peng, Y., Govindaraju, G. V., Lee, D. K., Choi, K.-S. & Andrew, T. L. Integrating a semitransparent, fullerene-free organic solar cell in tandem with a BiVO4 photoanode for unassisted solar water splitting. *ACS Appl. Mate. Interfaces* **9**, 22449-22455 (2017).
